# Supplementary material for: Branched polyethyleneimine modified with hyaluronic acid via a PEG spacer for targeted anticancer drug delivery
Source: Royal Society of Chemistry journal article supplement (doi:10.1039/c5ra23022e), 2016-01-01
Supplement: c5ra23022e1.pdf [file c5ra23022e1.pdf]

## Electronic Supplementary Information

### **Branched polyethyleneimine modified with hyaluronic acid *via* a PEG spacer for targeted anticancer drug delivery**

Chen Chen, ‡<sup>a</sup> Benqing Zhou, ‡<sup>a</sup> Xiaoyue Zhu,<sup>a</sup> Mingwu Shen,<sup>a</sup> Xiangyang Shi<sup>a, b\*</sup>

<sup>a</sup> *College of Chemistry, Chemical Engineering and Biotechnology, Donghua University, Shanghai 201620, People's Republic of China.*

<sup>b</sup> *State Key Laboratory for Modification of Chemical Fibers and Polymer Materials, College of Materials Science and Engineering, Donghua University, Shanghai 201620, People's Republic of China*

---

\*To whom correspondence should be addressed. E-mail: xshi@dhu.edu.cn (X. Shi)

**Table S1.** Zeta potential and hydrodynamic size of PEI-FI-(PEG-HA) conjugate.

| Time (days) | Zeta potential (mV) | Hydrodynamic size (nm) |
|-------------|---------------------|------------------------|
| 1           | $-18.4 \pm 1.44$    | $190.2 \pm 0.64$       |
| 2           | $-17.3 \pm 1.30$    | $197.3 \pm 0.67$       |
| 4           | $-18.2 \pm 1.08$    | $202.6 \pm 0.49$       |
| 7           | $-19.4 \pm 1.50$    | $192.0 \pm 0.23$       |

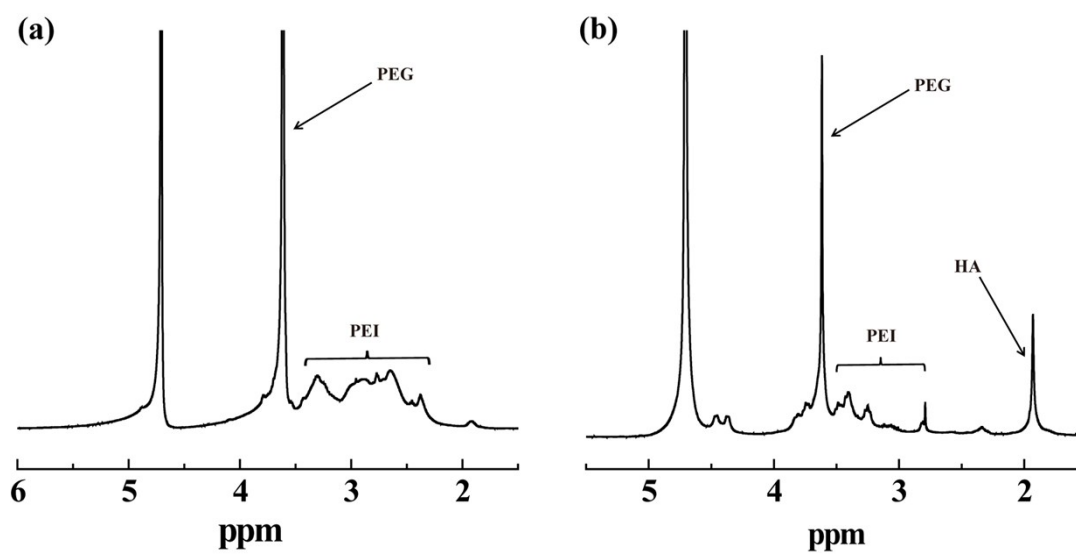

**Figure S1.**  $^1\text{H}$  NMR spectra of PEI-PEG (a), and PEI-(PEG-HA) (b), respectively.

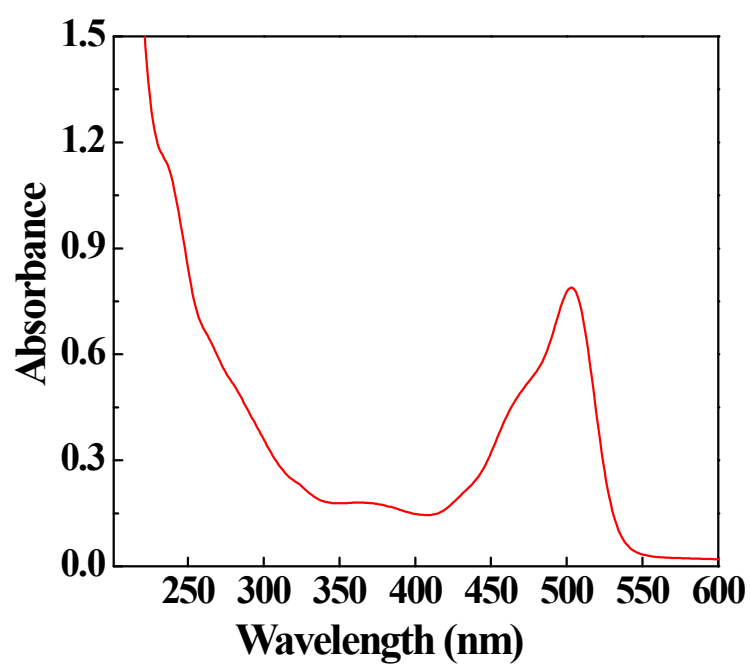

**Figure S2.** UV-vis spectrum of PEI-FI-(PEG-HA) conjugate.

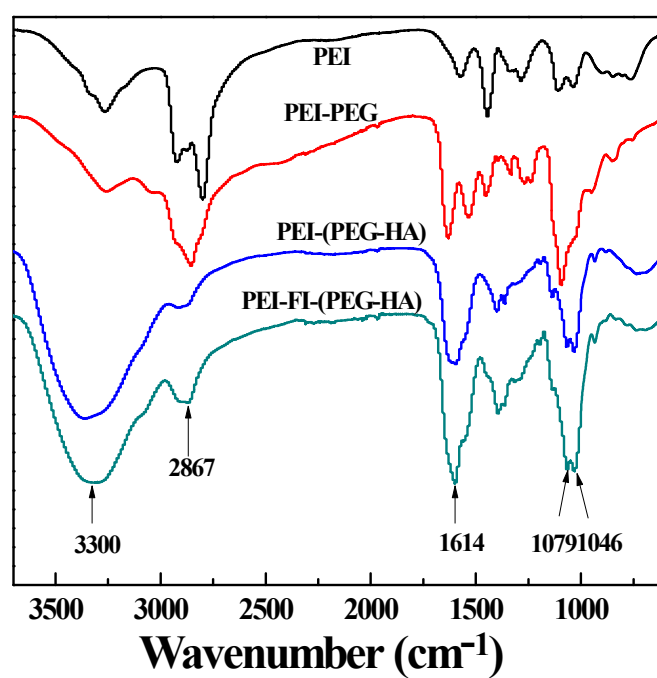

**Figure S3.** FTIR spectra of PEI, PEI-PEG, PEI-(PEG-HA), and PEI-FI-(PEG-HA), respectively.

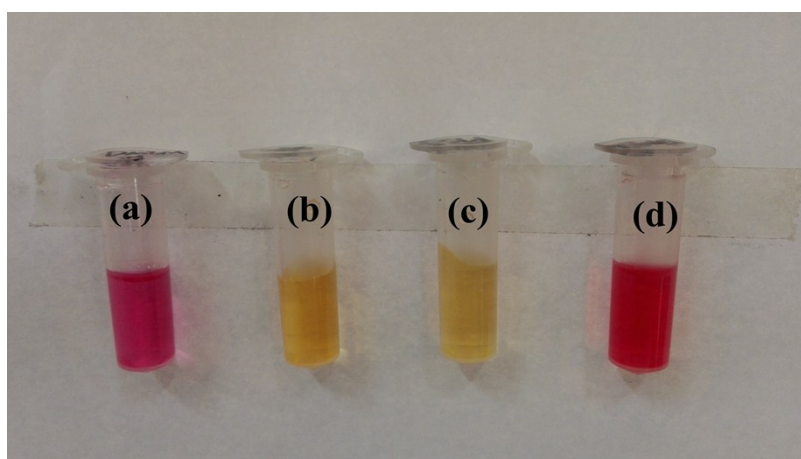

**Figure S4.** Photos of PEI-FI-(PEG-HA) conjugate dispersed in water (b), PBS (c), and cell culture medium (d) for 7 days. Blank cell culture medium is shown in (a).

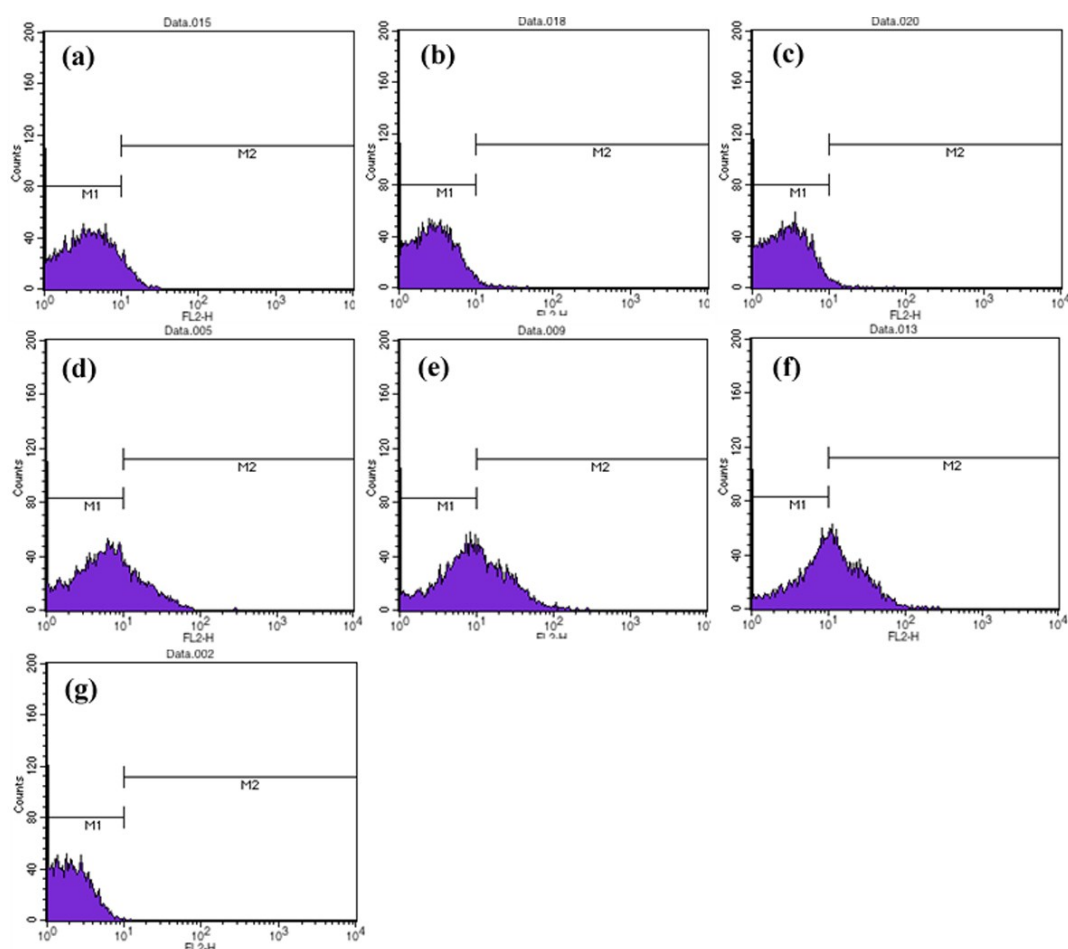

**Figure S5.** Flow cytometric analysis of HeLa-LCD44 (a, b, c), and HeLa-HCD44 (d, e, f) cells treated with the PEI-FI-(PEG-HA)/DOX complexes at the DOX concentrations of 8.0  $\mu\text{g/mL}$  (a, d), 10.0  $\mu\text{g/mL}$  (b, e), and 15.0  $\mu\text{g/mL}$  (c, f) for 4 h at 37  $^{\circ}\text{C}$ , respectively. HeLa-HCD44 cells treated with NS (g) were used as control.
